# Supplementary material for: Nursing Management of Gastrointestinal Adverse Events Associated With Delayed-Release Dimethyl Fumarate: A Global Delphi Approach
Source: PubMed Central journal article supplement — J Neurosci Nurs. 2020 Feb 14;52(2):72–7. doi: 10.1097/JNN.0000000000000495 (PMC7069393; doi:10.1097/jnn.0000000000000495), 2020-02-14
Supplement: jnn-52-72-s005.pdf [file jnn-52-72-s005.pdf]

FIGURE. GI AEs Associated With Use of DMF

Questions

Of patients who have started DMF as first-line therapy in the last 6 months, what percentage has had GI AEs? (n=190; Round 2)

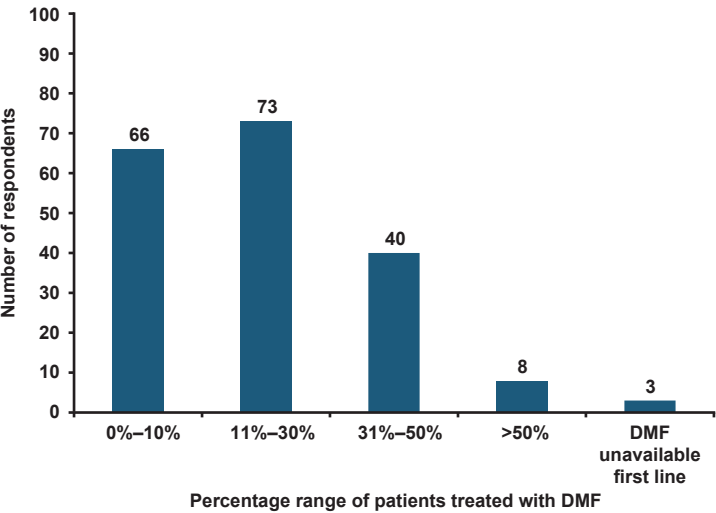

Of patients who switched to DMF in the last 6 months, what percentage has had GI AEs? (n=190; Round 2)

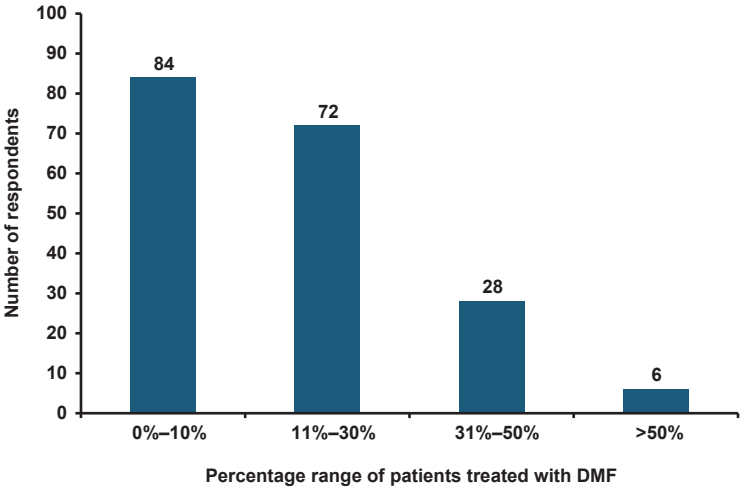

Why do patients temporarily discontinue in the first 6 months? (Choose all that apply) (n=91; Round 2)

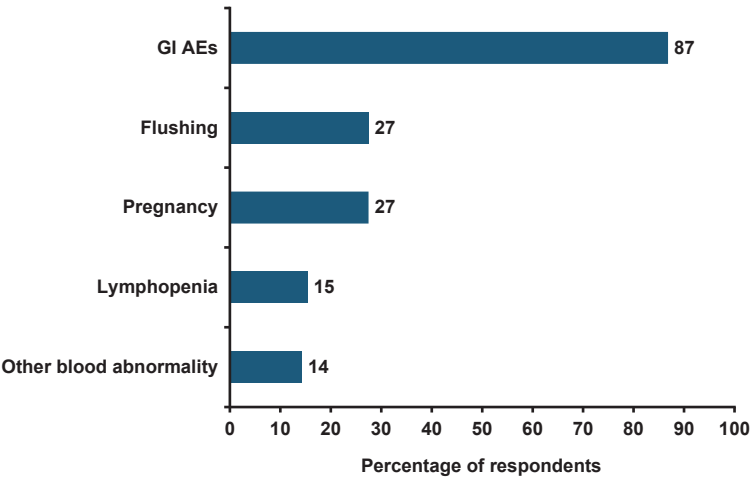

If due to GI AEs, which ones contributed to temporary discontinuation in the first 6 months? (Choose all that apply) (n=79; Round 2)

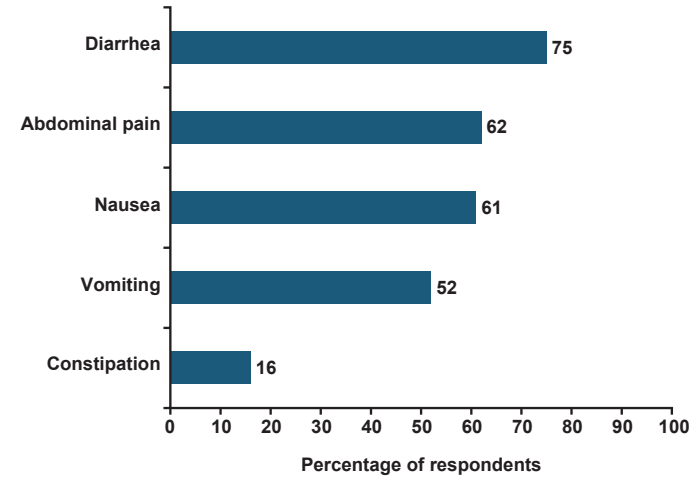

Which GI AEs contributed to permanent discontinuation in the first 6 months?  
Which GI AEs contributed to permanent discontinuation beyond the first 6 months? (1 most common; 5 least common) (n=190; Round 2)

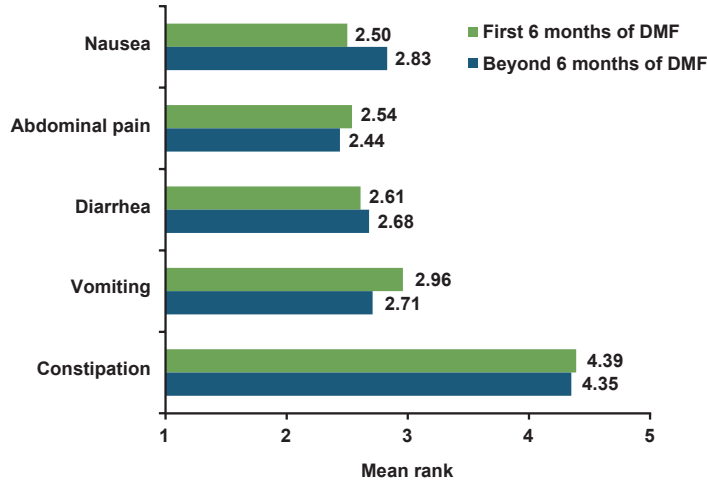

Abbreviations: AE, adverse event; DMF, delayed-release dimethyl fumarate; GI, gastrointestinal.
