# Supplementary material for: Nursing Management of Gastrointestinal Adverse Events Associated With Delayed-Release Dimethyl Fumarate: A Global Delphi Approach
Source: PubMed Central journal article supplement — J Neurosci Nurs. 2020 Feb 14;52(2):72–7. doi: 10.1097/JNN.0000000000000495 (PMC7069393; doi:10.1097/jnn.0000000000000495), 2020-02-14
Supplement: jnn-52-72-s007.pdf [file jnn-52-72-s007.pdf]

**FIGURE. Managing DMF-Associated GI AEs**

**Questions**

Over the past 6 months, have you recommended pharmacologic interventions to manage GI AEs? (n=190; Round 2)

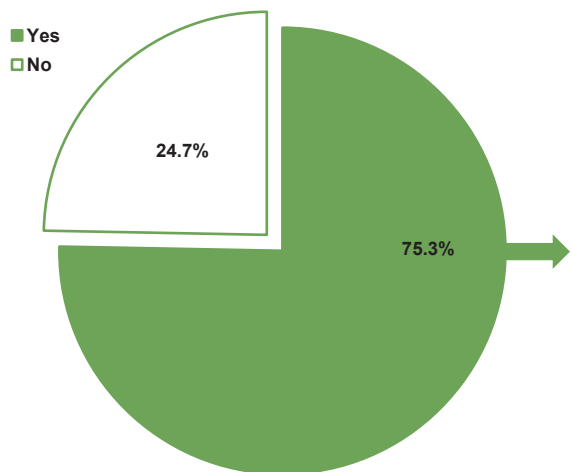

If yes, what percentage of patients using pharmacologic interventions stayed on DMF? (n=143; Round 2)

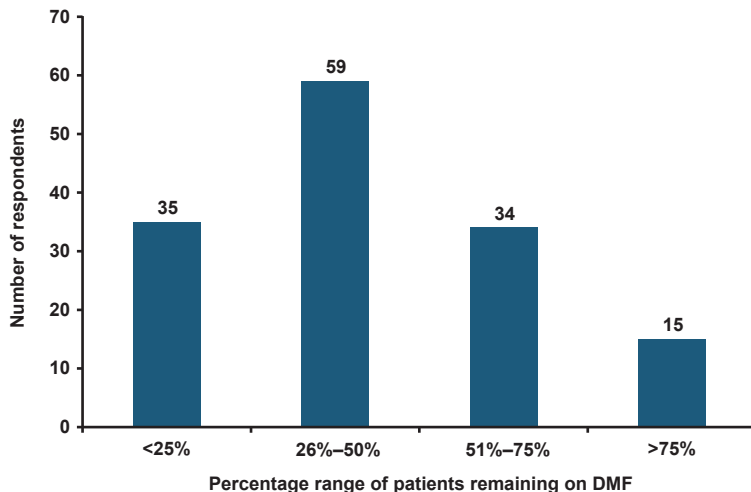

Over the past 6 months, have you recommended nonpharmacologic interventions to manage GI AEs? (n=190; Round 2)

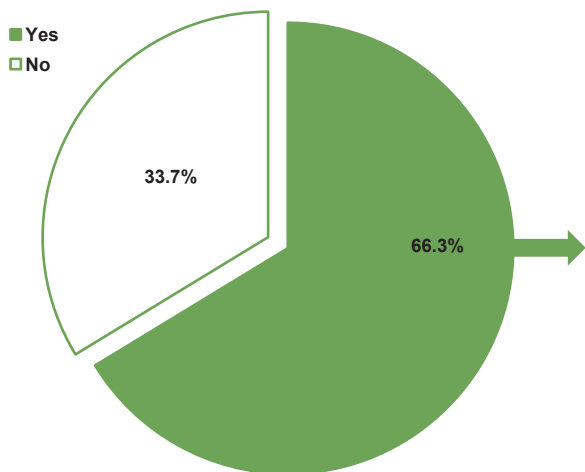

If yes, what percentage of patients using nonpharmacologic interventions stayed on DMF? (n=126; Round 2)

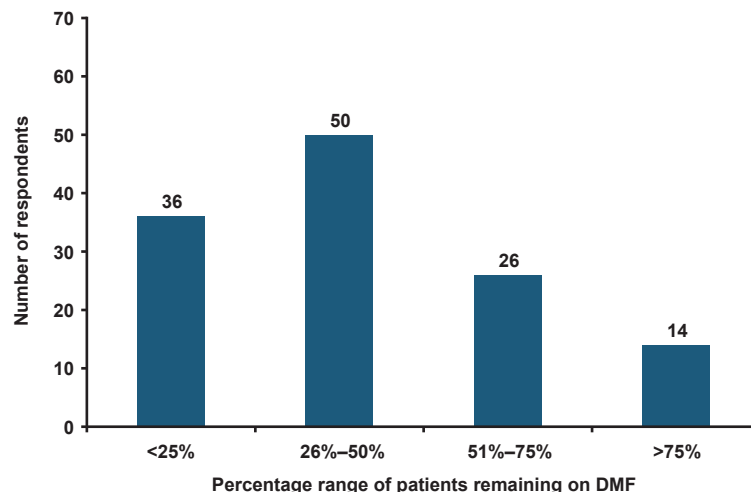

If you recommend nonpharmacologic interventions for GI AEs, which do you recommend? (Choose all that apply) (n=190; Round 2)

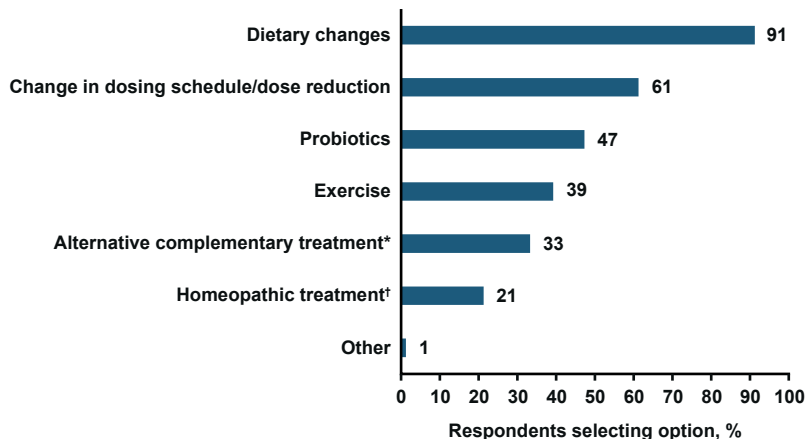

Abbreviations: AE, adverse event; DMF, delayed-release dimethyl fumarate; GI, gastrointestinal.

\*For example, acupuncture, massage, and meditation.

†For example, essential oils.
